# Supplementary material
Source: ML conference proceedings conference paper supplement (https://proceedings.neurips.cc/paper_files/paper/2009/hash/85d8ce590ad8981ca2c8286f79f59954-Abstract.html)
Supplement: Supplementary file 1 [file 85d8ce590ad8981ca2c8286f79f59954-Supplemental.zip]

Archive with 1 entries (1 files):
- extra/NIPS2009_0197_extra.pdf
