# Supplementary material
Source: ML conference proceedings conference paper supplement (https://proceedings.neurips.cc/paper_files/paper/2009/hash/85d8ce590ad8981ca2c8286f79f59954-Abstract.html)
Supplement: Supplementary file 1 [file 85d8ce590ad8981ca2c8286f79f59954-Supplemental.zip › extra/NIPS2009_0197_extra.pdf]

---

# Exponential Family Graph Matching and Ranking

---

James Petterson, Tib  rio S. Caetano, Julian J. McAuley and Jin Yu  
NICTA, Australian National University  
Canberra, Australia

## Appendix A

For completeness we include a description of the sampling algorithm presented in [1]. The algorithm is an *accept-reject* algorithm. The core idea of such an algorithm is very simple: assume we need to sample from a distribution  $p$  in a given domain  $\mathcal{M}$ , but that such a task is intractable. Instead, we sample from a distribution  $q$  in a *superset*  $\mathcal{N}$  of the original domain (in which sampling is easier), whose restriction to the original domain coincides with the original distribution:  $q|_{\mathcal{M}} = p$ . We then only ‘accept’ those samples that effectively fall within the original domain  $\mathcal{M}$ . Clearly, the efficiency of such a procedure will be dictated by (i) how efficient it is to sample from  $q$  in  $\mathcal{N}$  and (ii) how much mass of  $q$  is in  $\mathcal{M}$ . Roughly speaking, the algorithm presented in [1] manages to sample perfect matches of bipartite graphs such that both conditions (i) and (ii) are favorable.

The reasoning goes as follows: the problem consists of generating variates  $y \in \mathcal{Y}$  ( $y$  is a match) with the property that  $p(y) = w(y)/Z$ , where  $w(y)$  is the non-negative score of match  $y$  and  $Z = \sum_y w(y)$  is the partition function, which in our case is a permanent as discussed in Section 4.1. We first partition the space  $\mathcal{Y}$  into  $\mathcal{Y}_1, \dots, \mathcal{Y}_I$ , where  $\mathcal{Y}_i = \{y : y(1) = i\}$ . Each part has its own partition function  $Z_i = \sum_{y \in \mathcal{Y}_i} w(y)$ . Next, a suitable upper bound  $U(\mathcal{Y}_i) \geq Z_i$  on the partition function is constructed such that the following two properties hold:<sup>1</sup>

$$\begin{aligned} \text{(P1)} \quad & \sum_{i=1}^M U(\mathcal{Y}_i) \leq U(\mathcal{Y}). \\ \text{(P2)} \quad & \text{If } |\mathcal{Y}_i| = 1, \text{ then } U(\mathcal{Y}_i) = Z_i = w(y). \end{aligned}$$

That is, (i) the upper bound is super-additive in the elements of the partition and (ii) if  $\mathcal{Y}_i$  has a single match, the upper bound *equals* the partition function, which in this case is just the score of that match.

Now the algorithm: consider the random variable  $\mathcal{J}$  where  $p(\mathcal{J} = i) = U(\mathcal{Y}_i)/U(\mathcal{Y})$ . By (P1),  $\sum_{i=1}^M p(i) \leq 1$ , so assume  $p(\mathcal{J} = 0) = 1 - \sum_{i=1}^M p(i)$ . Now, draw a variate from this distribution, and if  $\mathcal{J} = i = 0$ , reject and restart, otherwise recursively sample in  $\mathcal{Y}_i$ .<sup>2</sup> This algorithm either stops and restarts or it reaches  $\mathcal{Y}_{\text{final}}$  which consists of a match, i.e.,  $|\mathcal{Y}_{\text{final}}| = 1$ . This match is then a legitimate sample from  $p(y)$ . The reason this is the case is because of (P2), as shown below. Assuming the algorithm finishes after  $k$  samples, the probability of the match is the telescopic product

$$\frac{U(\mathcal{Y}_{\mathcal{J}(1)})}{U(\mathcal{Y})} \frac{U(\mathcal{Y}_{\mathcal{J}(2)})}{U(\mathcal{Y}_{\mathcal{J}(1)})} \cdots \frac{U(\mathcal{Y}_{\mathcal{J}(k)})}{U(\mathcal{Y}_{\mathcal{J}(k-1)})} \stackrel{\text{(P2)}}{=} \frac{w(y)}{U(\mathcal{Y})}, \quad (1)$$

and since the probability of acceptance is  $Z/U(\mathcal{Y})$ , we have

$$p(y) = \frac{w(y)/U(\mathcal{Y})}{Z/U(\mathcal{Y})} = \frac{w(y)}{Z}, \quad (2)$$

---

<sup>1</sup>See [1] for details.

<sup>2</sup>Due to the self-reducibility of permutations, when we fix  $y(1) = i$ , what remains is also a set of permutations. We then sample  $y(2), y(3) \dots y(M)$ .

which is indeed the distribution from which we want to sample. For pseudocode and a rigorous presentation of the algorithm, see [1].

## **References**

- [1] Huber, M., & Law, J. (2008). Fast approximation of the permanent for very dense problems. *SODA*.
